# Supplementary material
Source: publisher figshare collection journal article supplement (https://acs.figshare.com/ndownloader/files/4674127)
Supplement: Supplementary file 1 [file 4674127]

data_07051b 
 
_audit_creation_method            SHELXL-97 
_chemical_name_systematic 
; 
 ? 
; 
_chemical_name_common             [(N2XY)Cu(BF)] 
_chemical_melting_point           ? 
_chemical_formula_moiety          'C35 H37 Cu N2 O3'  
_chemical_formula_sum 
 'C35 H37 Cu N2 O3' 
_chemical_formula_weight          597.21 
 
loop_ 
 _atom_type_symbol 
 _atom_type_description 
 _atom_type_scat_dispersion_real 
 _atom_type_scat_dispersion_imag 
 _atom_type_scat_source 
 'C'  'C'   0.0033   0.0016 
 'International Tables Vol C Tables 4.2.6.8 and 6.1.1.4' 
 'H'  'H'   0.0000   0.0000 
 'International Tables Vol C Tables 4.2.6.8 and 6.1.1.4' 
 'N'  'N'   0.0061   0.0033 
 'International Tables Vol C Tables 4.2.6.8 and 6.1.1.4' 
 'O'  'O'   0.0106   0.0060 
 'International Tables Vol C Tables 4.2.6.8 and 6.1.1.4' 
 'Cu'  'Cu'   0.3201   1.2651 
 'International Tables Vol C Tables 4.2.6.8 and 6.1.1.4' 
 
_symmetry_cell_setting            monoclinic 
_symmetry_space_group_name_H-M    P2(1)/n 
 
loop_ 
 _symmetry_equiv_pos_as_xyz 
 'x, y, z' 
 '-x+1/2, y+1/2, -z+1/2' 
 '-x, -y, -z' 
 'x-1/2, -y-1/2, z-1/2' 
 
_cell_length_a                    13.812(10) 
_cell_length_b                    14.651(9) 
_cell_length_c                    15.986(9) 
_cell_angle_alpha                 90.00 
_cell_angle_beta                  109.14(3) 
_cell_angle_gamma                 90.00 
_cell_volume                      3056(3) 
_cell_formula_units_Z             4 
_cell_measurement_temperature     173(2) 
_cell_measurement_reflns_used     3725 
_cell_measurement_theta_min       2.19
_cell_measurement_theta_max       24.97
 
_exptl_crystal_description        plate 
_exptl_crystal_colour             red-brown 
_exptl_crystal_size_max           0.48 
_exptl_crystal_size_mid           0.25 
_exptl_crystal_size_min           0.08 
_exptl_crystal_density_meas       ? 
_exptl_crystal_density_diffrn     1.298 
_exptl_crystal_density_method     'not measured' 
_exptl_crystal_F_000              1256 
_exptl_absorpt_coefficient_mu     0.752 
_exptl_absorpt_correction_type    multi-scan 
_exptl_absorpt_correction_T_min   0.711 
_exptl_absorpt_correction_T_max   0.949 
_exptl_absorpt_process_details    'SADABS,R.Blessing,1995' 
 
_exptl_special_details 
; 
 ? 
; 
 
_diffrn_ambient_temperature       173(2) 
_diffrn_radiation_wavelength      0.71073 
_diffrn_radiation_type            MoK\a 
_diffrn_radiation_source          'normal-focus sealed tube' 
_diffrn_radiation_monochromator   graphite 
_diffrn_measurement_device_type   'Bruker SMART Platform CCD' 
_diffrn_measurement_method        'area detector,omega scans per phi'   
_diffrn_detector_area_resol_mean  ? 
_diffrn_standards_number          ? 
_diffrn_standards_interval_count  ? 
_diffrn_standards_interval_time   ? 
_diffrn_standards_decay_%         ? 
_diffrn_reflns_number             28455 
_diffrn_reflns_av_R_equivalents   0.0358 
_diffrn_reflns_av_sigmaI/netI     0.0247 
_diffrn_reflns_limit_h_min        -16 
_diffrn_reflns_limit_h_max        16 
_diffrn_reflns_limit_k_min        -17 
_diffrn_reflns_limit_k_max        17 
_diffrn_reflns_limit_l_min        -19 
_diffrn_reflns_limit_l_max        19 
_diffrn_reflns_theta_min          1.94 
_diffrn_reflns_theta_max          25.06 
_reflns_number_total              5404 
_reflns_number_gt                 4529 
_reflns_threshold_expression      >2sigma(I) 
 
_computing_data_collection        'SMART,Bruker'  
_computing_cell_refinement        'SAINT,Bruker'  
_computing_data_reduction         'SAINT,Bruker' 
_computing_structure_solution     'SHELXS-97 (Sheldrick, 1990)' 
_computing_structure_refinement   'SHELXL-97 (Sheldrick, 1997)' 
_computing_molecular_graphics     'SHELXTL,Bruker' 
_computing_publication_material   ? 
 
_refine_special_details 
; 
 Refinement of F^2^ against ALL reflections.  The weighted R-factor wR and 
 goodness of fit S are based on F^2^, conventional R-factors R are based 
 on F, with F set to zero for negative F^2^. The threshold expression of 
 F^2^ > 2sigma(F^2^) is used only for calculating R-factors(gt) etc. and is 
 not relevant to the choice of reflections for refinement.  R-factors based 
 on F^2^ are statistically about twice as large as those based on F, and R- 
 factors based on ALL data will be even larger. 
; 
 
_refine_ls_structure_factor_coef  Fsqd  
_refine_ls_matrix_type            full 
_refine_ls_weighting_scheme       calc  
_refine_ls_weighting_details 
 'calc w=1/[\s^2^(Fo^2^)+(0.0419P)^2^+1.4458P] where P=(Fo^2^+2Fc^2^)/3' 
_atom_sites_solution_primary      direct 
_atom_sites_solution_secondary    difmap 
_atom_sites_solution_hydrogens    geom 
_refine_ls_hydrogen_treatment     constr 
_refine_ls_extinction_method      none 
_refine_ls_extinction_coef        ? 
_refine_ls_number_reflns          5404 
_refine_ls_number_parameters      377 
_refine_ls_number_restraints      4 
_refine_ls_R_factor_all           0.0415 
_refine_ls_R_factor_gt            0.0303 
_refine_ls_wR_factor_ref          0.0866 
_refine_ls_wR_factor_gt           0.0779 
_refine_ls_goodness_of_fit_ref    1.062 
_refine_ls_restrained_S_all       1.061 
_refine_ls_shift/su_max           0.002 
_refine_ls_shift/su_mean          0.000 
 
loop_ 
 _atom_site_label 
 _atom_site_type_symbol 
 _atom_site_fract_x 
 _atom_site_fract_y 
 _atom_site_fract_z 
 _atom_site_U_iso_or_equiv 
 _atom_site_adp_type 
 _atom_site_occupancy 
 _atom_site_symmetry_multiplicity 
 _atom_site_calc_flag 
 _atom_site_refinement_flags 
 _atom_site_disorder_assembly 
 _atom_site_disorder_group 
Cu1 Cu 0.618224(17) 0.698413(16) 0.283917(16) 0.03117(9) Uani 1 1 d . A . 
O1 O 0.50120(11) 0.62901(10) 0.22632(9) 0.0401(4) Uani 1 1 d . . . 
C18 C 0.67208(15) 0.72350(14) -0.01413(13) 0.0316(4) Uani 1 1 d . A . 
H18A H 0.6747 0.6754 -0.0532 0.038 Uiso 1 1 calc R . . 
C17 C 0.69617(14) 0.70563(12) 0.07621(12) 0.0262(4) Uani 1 1 d D . . 
C16 C 0.69306(13) 0.77839(12) 0.13206(11) 0.0235(4) Uani 1 1 d . A . 
C20 C 0.63730(15) 0.88004(14) 0.00818(13) 0.0332(4) Uani 1 1 d . A . 
H20A H 0.6161 0.9389 -0.0159 0.040 Uiso 1 1 calc R . . 
C25 C 0.64182(16) 0.94023(13) 0.15897(13) 0.0324(4) Uani 1 1 d . A . 
H25A H 0.6924 0.9310 0.2195 0.039 Uiso 1 1 calc R . . 
C19 C 0.64454(16) 0.81025(14) -0.04756(13) 0.0353(5) Uani 1 1 d . . . 
H19A H 0.6306 0.8218 -0.1089 0.042 Uiso 1 1 calc R A . 
C22 C 0.72524(16) 0.61024(13) 0.11294(13) 0.0334(4) Uani 0.80(2) 1 d PD A 1 
H22A H 0.7175 0.6087 0.1730 0.040 Uiso 0.80(2) 1 calc PR A 1 
C23 C 0.8371(4) 0.5902(4) 0.1254(7) 0.0540(15) Uani 0.80(2) 1 d PD A 1 
H23A H 0.8801 0.6392 0.1602 0.081 Uiso 0.80(2) 1 calc PR A 1 
H23B H 0.8467 0.5865 0.0674 0.081 Uiso 0.80(2) 1 calc PR A 1 
H23C H 0.8567 0.5320 0.1566 0.081 Uiso 0.80(2) 1 calc PR A 1 
C24 C 0.6544(7) 0.5371(6) 0.0574(6) 0.073(2) Uani 0.80(2) 1 d PD A 1 
H24A H 0.5832 0.5520 0.0511 0.110 Uiso 0.80(2) 1 calc PR A 1 
H24B H 0.6722 0.4777 0.0867 0.110 Uiso 0.80(2) 1 calc PR A 1 
H24C H 0.6624 0.5345 -0.0013 0.110 Uiso 0.80(2) 1 calc PR A 1 
C22' C 0.72524(16) 0.61024(13) 0.11294(13) 0.0334(4) Uani 0.20(2) 1 d PD A 2 
H22B H 0.7435 0.6123 0.1788 0.040 Uiso 0.20(2) 1 calc PR A 2 
C23' C 0.8187(17) 0.5785(17) 0.090(2) 0.0540(15) Uani 0.20(2) 1 d PD A 2 
H23D H 0.8429 0.5201 0.1189 0.081 Uiso 0.20(2) 1 calc PR A 2 
H23E H 0.8733 0.6241 0.1099 0.081 Uiso 0.20(2) 1 calc PR A 2 
H23F H 0.7998 0.5710 0.0254 0.081 Uiso 0.20(2) 1 calc PR A 2 
C24' C 0.638(3) 0.544(3) 0.076(3) 0.073(2) Uani 0.20(2) 1 d PD A 2 
H24D H 0.6611 0.4820 0.0970 0.110 Uiso 0.20(2) 1 calc PR A 2 
H24E H 0.6156 0.5450 0.0112 0.110 Uiso 0.20(2) 1 calc PR A 2 
H24F H 0.5806 0.5608 0.0962 0.110 Uiso 0.20(2) 1 calc PR A 2 
N2 N 0.71525(11) 0.76222(10) 0.22507(9) 0.0232(3) Uani 1 1 d . . . 
C26 C 0.53412(17) 0.92695(15) 0.16505(15) 0.0429(5) Uani 1 1 d . . . 
H26A H 0.5200 0.9754 0.2017 0.064 Uiso 1 1 calc R . . 
H26B H 0.5302 0.8674 0.1917 0.064 Uiso 1 1 calc R . . 
H26C H 0.4834 0.9296 0.1055 0.064 Uiso 1 1 calc R . . 
C15 C 0.89168(16) 0.82066(17) 0.25943(14) 0.0424(5) Uani 1 1 d . . . 
H15A H 0.8751 0.8227 0.1950 0.064 Uiso 1 1 calc R A . 
H15B H 0.9514 0.7813 0.2852 0.064 Uiso 1 1 calc R . . 
H15C H 0.9071 0.8824 0.2837 0.064 Uiso 1 1 calc R . . 
N1 N 0.72423(11) 0.74523(10) 0.39154(10) 0.0247(3) Uani 1 1 d . . . 
O2 O 0.55682(12) 0.51419(11) 0.32215(11) 0.0490(4) Uani 1 1 d . . . 
C14 C 0.80209(13) 0.78328(12) 0.28155(12) 0.0238(4) Uani 1 1 d . A . 
O3 O 0.37575(13) 0.43448(11) 0.19175(13) 0.0593(5) Uani 1 1 d . . . 
C30 C 0.29504(15) 0.56956(14) 0.21786(13) 0.0348(5) Uani 1 1 d . . . 
C27 C 0.65594(19) 1.03709(14) 0.12949(15) 0.0455(6) Uani 1 1 d . . . 
H27A H 0.7250 1.0435 0.1256 0.068 Uiso 1 1 calc R . . 
H27B H 0.6469 1.0809 0.1726 0.068 Uiso 1 1 calc R . . 
H27C H 0.6050 1.0490 0.0713 0.068 Uiso 1 1 calc R . . 
C29 C 0.38492(15) 0.51144(15) 0.22191(14) 0.0363(5) Uani 1 1 d . . . 
C32 C 0.2207(2) 0.70582(18) 0.25439(17) 0.0519(6) Uani 1 1 d . . . 
H32A H 0.2278 0.7615 0.2863 0.062 Uiso 1 1 calc R . . 
C33 C 0.1257(2) 0.6790(2) 0.19858(18) 0.0569(7) Uani 1 1 d . . . 
H33A H 0.0680 0.7175 0.1904 0.068 Uiso 1 1 calc R . . 
C34 C 0.11422(19) 0.5969(2) 0.15479(18) 0.0605(7) Uani 1 1 d . . . 
H34A H 0.0482 0.5780 0.1180 0.073 Uiso 1 1 calc R . . 
C31 C 0.30588(17) 0.65135(15) 0.26392(14) 0.0398(5) Uani 1 1 d . . . 
H31A H 0.3714 0.6700 0.3019 0.048 Uiso 1 1 calc R . . 
C21 C 0.66039(14) 0.86619(12) 0.09873(12) 0.0271(4) Uani 1 1 d . . . 
C28 C 0.49198(15) 0.55340(13) 0.26249(13) 0.0313(4) Uani 1 1 d . . . 
C35 C 0.19784(18) 0.54224(18) 0.16406(17) 0.0502(6) Uani 1 1 d . . . 
H35A H 0.1894 0.4855 0.1337 0.060 Uiso 1 1 calc R . . 
C2 C 0.80943(16) 0.76263(15) 0.54660(13) 0.0367(5) Uani 1 1 d . . . 
H2A H 0.8071 0.7598 0.6053 0.044 Uiso 1 1 calc R A . 
C6 C 0.62367(16) 0.71599(14) 0.48785(13) 0.0325(4) Uani 1 1 d . . . 
C4 C 0.89941(15) 0.79353(12) 0.44569(13) 0.0302(4) Uani 1 1 d . . . 
H4A H 0.9599 0.8113 0.4341 0.036 Uiso 1 1 calc R A . 
C1 C 0.72236(15) 0.74112(12) 0.47503(12) 0.0286(4) Uani 1 1 d . A . 
C5 C 0.81094(13) 0.77289(11) 0.37689(12) 0.0232(4) Uani 1 1 d . A . 
C7 C 0.61541(18) 0.63453(15) 0.53112(14) 0.0411(5) Uani 1 1 d . A . 
C11 C 0.54008(17) 0.77646(16) 0.45936(14) 0.0389(5) Uani 1 1 d . A . 
C10 C 0.44946(18) 0.75403(18) 0.47439(15) 0.0486(6) Uani 1 1 d . . . 
H10A H 0.3925 0.7942 0.4549 0.058 Uiso 1 1 calc R A . 
C8 C 0.5228(2) 0.61559(18) 0.54514(15) 0.0509(6) Uani 1 1 d . . . 
H8A H 0.5163 0.5609 0.5747 0.061 Uiso 1 1 calc R A . 
C3 C 0.89819(16) 0.78774(14) 0.53209(13) 0.0367(5) Uani 1 1 d . A . 
H3A H 0.9581 0.8010 0.5805 0.044 Uiso 1 1 calc R . . 
C13 C 0.5481(2) 0.86611(17) 0.41576(18) 0.0561(7) Uani 1 1 d . . . 
H13A H 0.4861 0.9023 0.4084 0.084 Uiso 1 1 calc R A . 
H13B H 0.5551 0.8546 0.3576 0.084 Uiso 1 1 calc R . . 
H13C H 0.6082 0.8997 0.4529 0.084 Uiso 1 1 calc R . . 
C9 C 0.4411(2) 0.6744(2) 0.51707(16) 0.0533(7) Uani 1 1 d . A . 
H9A H 0.3788 0.6601 0.5272 0.064 Uiso 1 1 calc R . . 
C12 C 0.7020(2) 0.56703(18) 0.56043(19) 0.0604(7) Uani 1 1 d . . . 
H12A H 0.6843 0.5185 0.5951 0.091 Uiso 1 1 calc R A . 
H12B H 0.7643 0.5982 0.5970 0.091 Uiso 1 1 calc R . . 
H12C H 0.7137 0.5404 0.5083 0.091 Uiso 1 1 calc R . . 
 
loop_ 
 _atom_site_aniso_label 
 _atom_site_aniso_U_11 
 _atom_site_aniso_U_22 
 _atom_site_aniso_U_33 
 _atom_site_aniso_U_23 
 _atom_site_aniso_U_13 
 _atom_site_aniso_U_12 
Cu1 0.02518(14) 0.02906(14) 0.03806(16) -0.00057(10) 0.00871(10) -0.00564(9) 
O1 0.0372(8) 0.0463(9) 0.0297(7) 0.0082(6) 0.0012(6) -0.0178(7) 
C18 0.0320(10) 0.0353(11) 0.0291(10) -0.0059(8) 0.0121(8) -0.0030(8) 
C17 0.0230(9) 0.0281(10) 0.0285(10) -0.0007(8) 0.0098(8) -0.0032(7) 
C16 0.0228(9) 0.0262(9) 0.0219(9) 0.0010(7) 0.0077(7) -0.0046(7) 
C20 0.0369(11) 0.0315(10) 0.0282(10) 0.0061(8) 0.0067(8) 0.0010(8) 
C25 0.0412(11) 0.0240(10) 0.0280(10) 0.0013(8) 0.0061(8) 0.0019(8) 
C19 0.0373(11) 0.0449(12) 0.0228(10) 0.0032(9) 0.0084(8) -0.0016(9) 
C22 0.0430(11) 0.0245(10) 0.0343(11) -0.0010(8) 0.0150(9) 0.0006(8) 
C23 0.056(2) 0.0500(19) 0.061(4) 0.016(2) 0.025(2) 0.0222(17) 
C24 0.096(4) 0.033(2) 0.071(5) 0.000(2) 0.002(2) -0.019(3) 
C22' 0.0430(11) 0.0245(10) 0.0343(11) -0.0010(8) 0.0150(9) 0.0006(8) 
C23' 0.056(2) 0.0500(19) 0.061(4) 0.016(2) 0.025(2) 0.0222(17) 
C24' 0.096(4) 0.033(2) 0.071(5) 0.000(2) 0.002(2) -0.019(3) 
N2 0.0263(8) 0.0195(7) 0.0240(8) 0.0009(6) 0.0085(6) -0.0016(6) 
C26 0.0504(13) 0.0356(12) 0.0456(13) -0.0021(10) 0.0197(11) 0.0047(10) 
C15 0.0314(11) 0.0634(15) 0.0327(11) 0.0038(10) 0.0110(9) -0.0119(10) 
N1 0.0285(8) 0.0216(8) 0.0240(8) 0.0008(6) 0.0087(6) 0.0013(6) 
O2 0.0395(9) 0.0421(9) 0.0575(10) 0.0124(8) 0.0053(8) -0.0022(7) 
C14 0.0247(9) 0.0192(9) 0.0270(9) 0.0005(7) 0.0077(8) 0.0006(7) 
O3 0.0458(10) 0.0402(10) 0.0861(13) -0.0218(9) 0.0138(9) -0.0117(7) 
C30 0.0332(11) 0.0409(12) 0.0315(11) 0.0016(9) 0.0122(9) -0.0076(9) 
C27 0.0642(15) 0.0249(11) 0.0446(13) 0.0002(9) 0.0139(11) -0.0014(10) 
C29 0.0356(11) 0.0364(12) 0.0365(11) -0.0020(9) 0.0111(9) -0.0091(9) 
C32 0.0639(17) 0.0559(15) 0.0464(14) -0.0004(11) 0.0326(13) 0.0060(12) 
C33 0.0451(14) 0.0760(19) 0.0560(16) 0.0165(14) 0.0253(12) 0.0172(13) 
C34 0.0360(13) 0.083(2) 0.0579(16) -0.0021(15) 0.0096(12) 0.0001(13) 
C31 0.0429(12) 0.0474(13) 0.0328(11) -0.0011(10) 0.0174(10) -0.0055(10) 
C21 0.0274(9) 0.0254(9) 0.0266(10) 0.0020(8) 0.0063(8) -0.0035(7) 
C28 0.0321(11) 0.0329(10) 0.0296(10) -0.0040(9) 0.0109(9) -0.0058(8) 
C35 0.0376(13) 0.0561(15) 0.0531(15) -0.0053(12) 0.0098(11) -0.0090(11) 
C2 0.0451(12) 0.0411(12) 0.0234(10) -0.0005(9) 0.0104(9) 0.0034(10) 
C6 0.0417(11) 0.0355(11) 0.0244(10) -0.0042(8) 0.0164(9) -0.0033(9) 
C4 0.0286(10) 0.0279(10) 0.0309(10) -0.0023(8) 0.0056(8) 0.0013(8) 
C1 0.0389(11) 0.0232(9) 0.0249(10) 0.0009(7) 0.0120(8) 0.0038(8) 
C5 0.0260(9) 0.0173(8) 0.0255(9) 0.0010(7) 0.0074(7) 0.0019(7) 
C7 0.0579(14) 0.0400(12) 0.0309(11) -0.0015(9) 0.0220(10) -0.0052(10) 
C11 0.0419(12) 0.0456(12) 0.0329(11) -0.0043(9) 0.0172(9) 0.0030(10) 
C10 0.0423(13) 0.0654(16) 0.0421(13) -0.0131(12) 0.0193(11) -0.0004(12) 
C8 0.0705(17) 0.0514(14) 0.0404(13) -0.0054(11) 0.0315(12) -0.0208(13) 
C3 0.0371(11) 0.0395(12) 0.0263(10) -0.0034(9) 0.0004(8) 0.0023(9) 
C13 0.0611(16) 0.0516(15) 0.0631(16) 0.0147(12) 0.0305(13) 0.0233(12) 
C9 0.0485(14) 0.0740(18) 0.0471(14) -0.0194(13) 0.0288(12) -0.0188(13) 
C12 0.0772(19) 0.0459(14) 0.0658(17) 0.0199(13) 0.0338(15) 0.0042(13) 
 
_geom_special_details 
; 
 All esds (except the esd in the dihedral angle between two l.s. planes) 
 are estimated using the full covariance matrix.  The cell esds are taken 
 into account individually in the estimation of esds in distances, angles 
 and torsion angles; correlations between esds in cell parameters are only 
 used when they are defined by crystal symmetry.  An approximate (isotropic) 
 treatment of cell esds is used for estimating esds involving l.s. planes. 
; 
 
loop_ 
 _geom_bond_atom_site_label_1 
 _geom_bond_atom_site_label_2 
 _geom_bond_distance 
 _geom_bond_site_symmetry_2 
 _geom_bond_publ_flag 
Cu1 O1 1.8757(17) . ? 
Cu1 N1 1.9804(18) . ? 
Cu1 N2 2.0932(17) . ? 
O1 C28 1.275(2) . ? 
C18 C19 1.383(3) . ? 
C18 C17 1.396(3) . ? 
C18 H18A 0.9500 . ? 
C17 C16 1.400(3) . ? 
C17 C22 1.518(3) . ? 
C16 C21 1.409(3) . ? 
C16 N2 1.436(2) . ? 
C20 C19 1.381(3) . ? 
C20 C21 1.391(3) . ? 
C20 H20A 0.9500 . ? 
C25 C21 1.527(3) . ? 
C25 C27 1.528(3) . ? 
C25 C26 1.535(3) . ? 
C25 H25A 1.0000 . ? 
C19 H19A 0.9500 . ? 
C22 C23 1.521(4) . ? 
C22 C24 1.524(5) . ? 
C22 H22A 1.0000 . ? 
C23 H23A 0.9800 . ? 
C23 H23B 0.9800 . ? 
C23 H23C 0.9800 . ? 
C24 H24A 0.9800 . ? 
C24 H24B 0.9800 . ? 
C24 H24C 0.9800 . ? 
C23' H23D 0.9800 . ? 
C23' H23E 0.9800 . ? 
C23' H23F 0.9800 . ? 
C24' H24D 0.9800 . ? 
C24' H24E 0.9800 . ? 
C24' H24F 0.9800 . ? 
N2 C14 1.280(2) . ? 
C26 H26A 0.9800 . ? 
C26 H26B 0.9800 . ? 
C26 H26C 0.9800 . ? 
C15 C14 1.498(3) . ? 
C15 H15A 0.9800 . ? 
C15 H15B 0.9800 . ? 
C15 H15C 0.9800 . ? 
N1 C1 1.345(2) . ? 
N1 C5 1.355(2) . ? 
O2 C28 1.217(2) . ? 
C14 C5 1.496(3) . ? 
O3 C29 1.216(3) . ? 
C30 C31 1.389(3) . ? 
C30 C35 1.395(3) . ? 
C30 C29 1.489(3) . ? 
C27 H27A 0.9800 . ? 
C27 H27B 0.9800 . ? 
C27 H27C 0.9800 . ? 
C29 C28 1.535(3) . ? 
C32 C33 1.380(4) . ? 
C32 C31 1.388(3) . ? 
C32 H32A 0.9500 . ? 
C33 C34 1.374(4) . ? 
C33 H33A 0.9500 . ? 
C34 C35 1.373(4) . ? 
C34 H34A 0.9500 . ? 
C31 H31A 0.9500 . ? 
C35 H35A 0.9500 . ? 
C2 C3 1.371(3) . ? 
C2 C1 1.397(3) . ? 
C2 H2A 0.9500 . ? 
C6 C7 1.403(3) . ? 
C6 C11 1.407(3) . ? 
C6 C1 1.490(3) . ? 
C4 C5 1.383(3) . ? 
C4 C3 1.389(3) . ? 
C4 H4A 0.9500 . ? 
C7 C8 1.397(3) . ? 
C7 C12 1.503(4) . ? 
C11 C10 1.389(3) . ? 
C11 C13 1.508(3) . ? 
C10 C9 1.375(4) . ? 
C10 H10A 0.9500 . ? 
C8 C9 1.373(4) . ? 
C8 H8A 0.9500 . ? 
C3 H3A 0.9500 . ? 
C13 H13A 0.9800 . ? 
C13 H13B 0.9800 . ? 
C13 H13C 0.9800 . ? 
C9 H9A 0.9500 . ? 
C12 H12A 0.9800 . ? 
C12 H12B 0.9800 . ? 
C12 H12C 0.9800 . ? 
 
loop_ 
 _geom_angle_atom_site_label_1 
 _geom_angle_atom_site_label_2 
 _geom_angle_atom_site_label_3 
 _geom_angle 
 _geom_angle_site_symmetry_1 
 _geom_angle_site_symmetry_3 
 _geom_angle_publ_flag 
O1 Cu1 N1 152.48(6) . . ? 
O1 Cu1 N2 126.66(7) . . ? 
N1 Cu1 N2 80.55(7) . . ? 
C28 O1 Cu1 116.51(13) . . ? 
C19 C18 C17 120.93(18) . . ? 
C19 C18 H18A 119.5 . . ? 
C17 C18 H18A 119.5 . . ? 
C18 C17 C16 118.03(17) . . ? 
C18 C17 C22 121.05(17) . . ? 
C16 C17 C22 120.91(17) . . ? 
C17 C16 C21 121.81(17) . . ? 
C17 C16 N2 119.60(16) . . ? 
C21 C16 N2 118.39(16) . . ? 
C19 C20 C21 121.51(18) . . ? 
C19 C20 H20A 119.2 . . ? 
C21 C20 H20A 119.2 . . ? 
C21 C25 C27 113.61(17) . . ? 
C21 C25 C26 108.46(16) . . ? 
C27 C25 C26 111.21(18) . . ? 
C21 C25 H25A 107.8 . . ? 
C27 C25 H25A 107.8 . . ? 
C26 C25 H25A 107.8 . . ? 
C20 C19 C18 120.01(19) . . ? 
C20 C19 H19A 120.0 . . ? 
C18 C19 H19A 120.0 . . ? 
C17 C22 C23 110.9(2) . . ? 
C17 C22 C24 112.6(4) . . ? 
C23 C22 C24 111.8(4) . . ? 
C17 C22 H22A 107.1 . . ? 
C23 C22 H22A 107.1 . . ? 
C24 C22 H22A 107.1 . . ? 
C22 C23 H23A 109.5 . . ? 
C22 C23 H23B 109.5 . . ? 
H23A C23 H23B 109.5 . . ? 
C22 C23 H23C 109.5 . . ? 
H23A C23 H23C 109.5 . . ? 
H23B C23 H23C 109.5 . . ? 
C22 C24 H24A 109.5 . . ? 
C22 C24 H24B 109.5 . . ? 
H24A C24 H24B 109.5 . . ? 
C22 C24 H24C 109.5 . . ? 
H24A C24 H24C 109.5 . . ? 
H24B C24 H24C 109.5 . . ? 
H23D C23' H23E 109.5 . . ? 
H23D C23' H23F 109.5 . . ? 
H23E C23' H23F 109.5 . . ? 
H24D C24' H24E 109.5 . . ? 
H24D C24' H24F 109.5 . . ? 
H24E C24' H24F 109.5 . . ? 
C14 N2 C16 121.54(15) . . ? 
C14 N2 Cu1 112.37(13) . . ? 
C16 N2 Cu1 126.04(11) . . ? 
C25 C26 H26A 109.5 . . ? 
C25 C26 H26B 109.5 . . ? 
H26A C26 H26B 109.5 . . ? 
C25 C26 H26C 109.5 . . ? 
H26A C26 H26C 109.5 . . ? 
H26B C26 H26C 109.5 . . ? 
C14 C15 H15A 109.5 . . ? 
C14 C15 H15B 109.5 . . ? 
H15A C15 H15B 109.5 . . ? 
C14 C15 H15C 109.5 . . ? 
H15A C15 H15C 109.5 . . ? 
H15B C15 H15C 109.5 . . ? 
C1 N1 C5 119.37(16) . . ? 
C1 N1 Cu1 126.68(13) . . ? 
C5 N1 Cu1 113.38(12) . . ? 
N2 C14 C5 116.01(16) . . ? 
N2 C14 C15 125.25(17) . . ? 
C5 C14 C15 118.68(16) . . ? 
C31 C30 C35 119.3(2) . . ? 
C31 C30 C29 121.80(19) . . ? 
C35 C30 C29 118.9(2) . . ? 
C25 C27 H27A 109.5 . . ? 
C25 C27 H27B 109.5 . . ? 
H27A C27 H27B 109.5 . . ? 
C25 C27 H27C 109.5 . . ? 
H27A C27 H27C 109.5 . . ? 
H27B C27 H27C 109.5 . . ? 
O3 C29 C30 122.40(19) . . ? 
O3 C29 C28 119.96(19) . . ? 
C30 C29 C28 117.59(18) . . ? 
C33 C32 C31 119.9(2) . . ? 
C33 C32 H32A 120.0 . . ? 
C31 C32 H32A 120.0 . . ? 
C34 C33 C32 120.4(2) . . ? 
C34 C33 H33A 119.8 . . ? 
C32 C33 H33A 119.8 . . ? 
C35 C34 C33 120.2(2) . . ? 
C35 C34 H34A 119.9 . . ? 
C33 C34 H34A 119.9 . . ? 
C32 C31 C30 119.9(2) . . ? 
C32 C31 H31A 120.1 . . ? 
C30 C31 H31A 120.1 . . ? 
C20 C21 C16 117.55(17) . . ? 
C20 C21 C25 121.59(17) . . ? 
C16 C21 C25 120.63(16) . . ? 
O2 C28 O1 127.46(19) . . ? 
O2 C28 C29 120.09(18) . . ? 
O1 C28 C29 112.45(17) . . ? 
C34 C35 C30 120.3(2) . . ? 
C34 C35 H35A 119.8 . . ? 
C30 C35 H35A 119.8 . . ? 
C3 C2 C1 119.96(19) . . ? 
C3 C2 H2A 120.0 . . ? 
C1 C2 H2A 120.0 . . ? 
C7 C6 C11 120.3(2) . . ? 
C7 C6 C1 120.28(19) . . ? 
C11 C6 C1 119.38(18) . . ? 
C5 C4 C3 118.79(19) . . ? 
C5 C4 H4A 120.6 . . ? 
C3 C4 H4A 120.6 . . ? 
N1 C1 C2 120.74(18) . . ? 
N1 C1 C6 117.63(17) . . ? 
C2 C1 C6 121.59(18) . . ? 
N1 C5 C4 121.89(17) . . ? 
N1 C5 C14 115.14(15) . . ? 
C4 C5 C14 122.92(17) . . ? 
C8 C7 C6 118.4(2) . . ? 
C8 C7 C12 119.7(2) . . ? 
C6 C7 C12 121.9(2) . . ? 
C10 C11 C6 119.0(2) . . ? 
C10 C11 C13 119.5(2) . . ? 
C6 C11 C13 121.4(2) . . ? 
C9 C10 C11 120.9(2) . . ? 
C9 C10 H10A 119.6 . . ? 
C11 C10 H10A 119.6 . . ? 
C9 C8 C7 121.4(2) . . ? 
C9 C8 H8A 119.3 . . ? 
C7 C8 H8A 119.3 . . ? 
C2 C3 C4 119.19(19) . . ? 
C2 C3 H3A 120.4 . . ? 
C4 C3 H3A 120.4 . . ? 
C11 C13 H13A 109.5 . . ? 
C11 C13 H13B 109.5 . . ? 
H13A C13 H13B 109.5 . . ? 
C11 C13 H13C 109.5 . . ? 
H13A C13 H13C 109.5 . . ? 
H13B C13 H13C 109.5 . . ? 
C8 C9 C10 120.1(2) . . ? 
C8 C9 H9A 120.0 . . ? 
C10 C9 H9A 120.0 . . ? 
C7 C12 H12A 109.5 . . ? 
C7 C12 H12B 109.5 . . ? 
H12A C12 H12B 109.5 . . ? 
C7 C12 H12C 109.5 . . ? 
H12A C12 H12C 109.5 . . ? 
H12B C12 H12C 109.5 . . ? 
 
loop_ 
 _geom_torsion_atom_site_label_1 
 _geom_torsion_atom_site_label_2 
 _geom_torsion_atom_site_label_3 
 _geom_torsion_atom_site_label_4 
 _geom_torsion 
 _geom_torsion_site_symmetry_1 
 _geom_torsion_site_symmetry_2 
 _geom_torsion_site_symmetry_3 
 _geom_torsion_site_symmetry_4 
 _geom_torsion_publ_flag 
N1 Cu1 O1 C28 -36.2(2) . . . . ? 
N2 Cu1 O1 C28 134.05(14) . . . . ? 
C19 C18 C17 C16 -0.9(3) . . . . ? 
C19 C18 C17 C22 179.29(18) . . . . ? 
C18 C17 C16 C21 4.1(3) . . . . ? 
C22 C17 C16 C21 -176.13(17) . . . . ? 
C18 C17 C16 N2 178.69(16) . . . . ? 
C22 C17 C16 N2 -1.5(3) . . . . ? 
C21 C20 C19 C18 2.1(3) . . . . ? 
C17 C18 C19 C20 -2.1(3) . . . . ? 
C18 C17 C22 C23 81.0(5) . . . . ? 
C16 C17 C22 C23 -98.8(5) . . . . ? 
C18 C17 C22 C24 -45.1(5) . . . . ? 
C16 C17 C22 C24 135.1(5) . . . . ? 
C17 C16 N2 C14 102.3(2) . . . . ? 
C21 C16 N2 C14 -82.9(2) . . . . ? 
C17 C16 N2 Cu1 -74.7(2) . . . . ? 
C21 C16 N2 Cu1 100.14(17) . . . . ? 
O1 Cu1 N2 C14 -162.37(12) . . . . ? 
N1 Cu1 N2 C14 13.09(12) . . . . ? 
O1 Cu1 N2 C16 14.81(17) . . . . ? 
N1 Cu1 N2 C16 -169.74(15) . . . . ? 
O1 Cu1 N1 C1 -13.3(2) . . . . ? 
N2 Cu1 N1 C1 174.64(16) . . . . ? 
O1 Cu1 N1 C5 157.99(14) . . . . ? 
N2 Cu1 N1 C5 -14.10(12) . . . . ? 
C16 N2 C14 C5 173.16(15) . . . . ? 
Cu1 N2 C14 C5 -9.52(19) . . . . ? 
C16 N2 C14 C15 -4.0(3) . . . . ? 
Cu1 N2 C14 C15 173.32(16) . . . . ? 
C31 C30 C29 O3 170.0(2) . . . . ? 
C35 C30 C29 O3 -12.0(3) . . . . ? 
C31 C30 C29 C28 -12.6(3) . . . . ? 
C35 C30 C29 C28 165.40(19) . . . . ? 
C31 C32 C33 C34 2.4(4) . . . . ? 
C32 C33 C34 C35 -2.1(4) . . . . ? 
C33 C32 C31 C30 -0.6(3) . . . . ? 
C35 C30 C31 C32 -1.5(3) . . . . ? 
C29 C30 C31 C32 176.4(2) . . . . ? 
C19 C20 C21 C16 0.9(3) . . . . ? 
C19 C20 C21 C25 -173.50(19) . . . . ? 
C17 C16 C21 C20 -4.1(3) . . . . ? 
N2 C16 C21 C20 -178.76(16) . . . . ? 
C17 C16 C21 C25 170.41(17) . . . . ? 
N2 C16 C21 C25 -4.3(3) . . . . ? 
C27 C25 C21 C20 -32.6(3) . . . . ? 
C26 C25 C21 C20 91.6(2) . . . . ? 
C27 C25 C21 C16 153.12(18) . . . . ? 
C26 C25 C21 C16 -82.7(2) . . . . ? 
Cu1 O1 C28 O2 -12.1(3) . . . . ? 
Cu1 O1 C28 C29 168.26(13) . . . . ? 
O3 C29 C28 O2 -55.6(3) . . . . ? 
C30 C29 C28 O2 126.9(2) . . . . ? 
O3 C29 C28 O1 124.0(2) . . . . ? 
C30 C29 C28 O1 -53.5(2) . . . . ? 
C33 C34 C35 C30 -0.1(4) . . . . ? 
C31 C30 C35 C34 1.9(4) . . . . ? 
C29 C30 C35 C34 -176.2(2) . . . . ? 
C5 N1 C1 C2 -1.7(3) . . . . ? 
Cu1 N1 C1 C2 169.06(14) . . . . ? 
C5 N1 C1 C6 176.27(16) . . . . ? 
Cu1 N1 C1 C6 -12.9(2) . . . . ? 
C3 C2 C1 N1 -0.4(3) . . . . ? 
C3 C2 C1 C6 -178.31(19) . . . . ? 
C7 C6 C1 N1 115.1(2) . . . . ? 
C11 C6 C1 N1 -67.4(2) . . . . ? 
C7 C6 C1 C2 -66.9(3) . . . . ? 
C11 C6 C1 C2 110.5(2) . . . . ? 
C1 N1 C5 C4 2.7(3) . . . . ? 
Cu1 N1 C5 C4 -169.23(14) . . . . ? 
C1 N1 C5 C14 -174.64(15) . . . . ? 
Cu1 N1 C5 C14 13.40(18) . . . . ? 
C3 C4 C5 N1 -1.6(3) . . . . ? 
C3 C4 C5 C14 175.59(17) . . . . ? 
N2 C14 C5 N1 -2.1(2) . . . . ? 
C15 C14 C5 N1 175.21(17) . . . . ? 
N2 C14 C5 C4 -179.49(17) . . . . ? 
C15 C14 C5 C4 -2.1(3) . . . . ? 
C11 C6 C7 C8 -0.2(3) . . . . ? 
C1 C6 C7 C8 177.24(19) . . . . ? 
C11 C6 C7 C12 178.4(2) . . . . ? 
C1 C6 C7 C12 -4.2(3) . . . . ? 
C7 C6 C11 C10 -0.3(3) . . . . ? 
C1 C6 C11 C10 -177.73(19) . . . . ? 
C7 C6 C11 C13 177.7(2) . . . . ? 
C1 C6 C11 C13 0.2(3) . . . . ? 
C6 C11 C10 C9 0.5(3) . . . . ? 
C13 C11 C10 C9 -177.5(2) . . . . ? 
C6 C7 C8 C9 0.4(3) . . . . ? 
C12 C7 C8 C9 -178.2(2) . . . . ? 
C1 C2 C3 C4 1.5(3) . . . . ? 
C5 C4 C3 C2 -0.6(3) . . . . ? 
C7 C8 C9 C10 -0.2(4) . . . . ? 
C11 C10 C9 C8 -0.3(4) . . . . ? 
 
_diffrn_measured_fraction_theta_max    0.997 
_diffrn_reflns_theta_full              25.06 
_diffrn_measured_fraction_theta_full   0.997 
_refine_diff_density_max    0.303 
_refine_diff_density_min   -0.293 
_refine_diff_density_rms    0.046 
